# Supplementary material for: Thermally stable and highly active Pt/CeO2@SiO2 catalysts with a porous/hollow structure
Source: Royal Society of Chemistry journal article supplement (doi:10.1039/c8cy01070f), 2018-01-01
Supplement: c8cy01070f1.pdf [file c8cy01070f1.pdf]

## Electronic supplementary information

### Thermally Stable and Highly Active Pt/CeO<sub>2</sub>@SiO<sub>2</sub> Catalysts with a Porous/Hollow Structure

Guozhu Chen,<sup>a\*#</sup> Ying Yang,<sup>a#</sup> Zeyi Guo,<sup>a</sup> Daowei Gao,<sup>a</sup> Wei Zhao,<sup>b</sup> Han Yan,<sup>c</sup> Wei-Wei Wang,<sup>c</sup> Chun-Jiang Jia<sup>\*c</sup> and Guoxin Sun<sup>a</sup>

<sup>[a]</sup> Prof. Dr. G. Chen, Prof. Dr. G. Sun, Dr. D. Gao, Y. Yang, Z. Guo

Key Laboratory of Interfacial Reaction & Sensing Analysis in Universities of Shandong School of Chemistry and Chemical Engineering  
University of Jinan

Jinan, Shandong Province, 250022 (China)

E-mail: chm\_chengz@ujn.edu.cn (G. Chen)

<sup>[b]</sup> Dr. W. Zhao

Shandong Institute and Laboratory of Geological Sciences  
Jinan, Shandong Province, 250013 (China)

<sup>[c]</sup> Prof. C. Jia, Dr. W. Wang, Mr. H. Yan

School of Chemistry and Chemical Engineering

Shandong University

Jinan, Shandong Province, 250100 (China)

E-mail: jiacj@sdu.edu.cn (C. Jia)

<sup>#</sup> These authors contributed equally to this work.

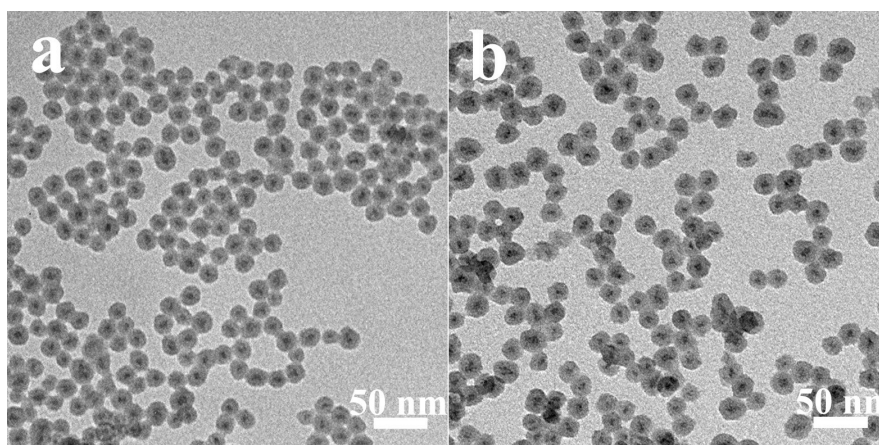

**Figure S1.** TEM images of the solid Pt/CeO<sub>2</sub>@SiO<sub>2</sub> (a) and solid Pt/CeO<sub>2</sub>-CuO@SiO<sub>2</sub> (b) catalysts.

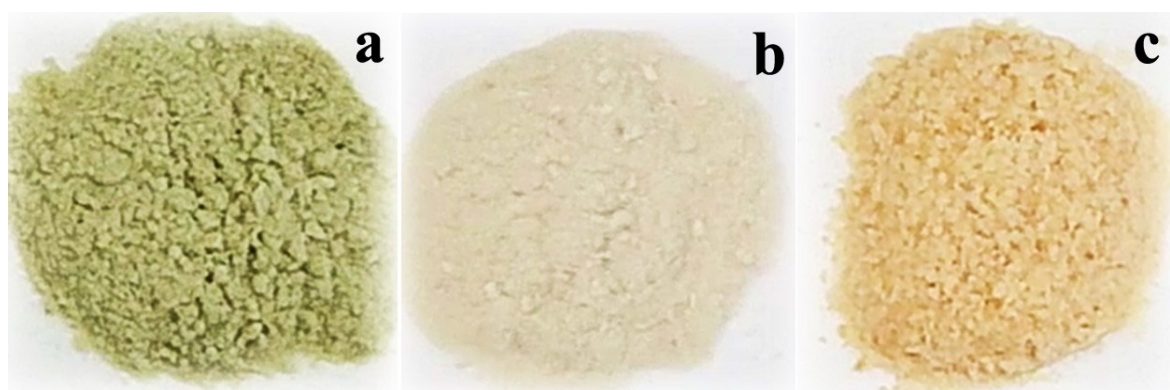

**Figure S2.** The color of the samples: (a) solid Pt/CeO<sub>2</sub>-CuO@SiO<sub>2</sub> (b) porous/hollow structured Pt/CeO<sub>2</sub>@SiO<sub>2</sub> and (c) solid Pt/CeO<sub>2</sub>@SiO<sub>2</sub>.

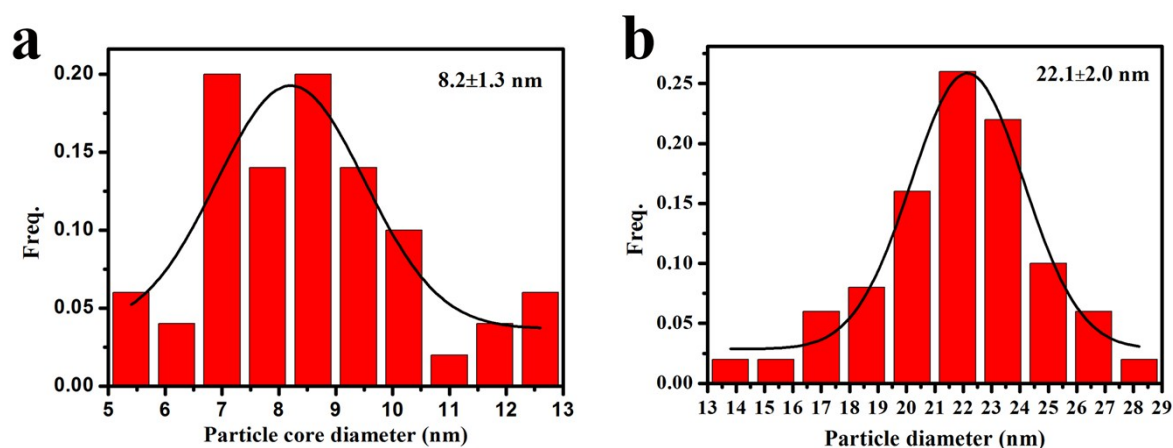

**Figure S3.** The statistical graphs of size distribution for the porous/hollow structured nanoparticles (a) and for their cores (b).

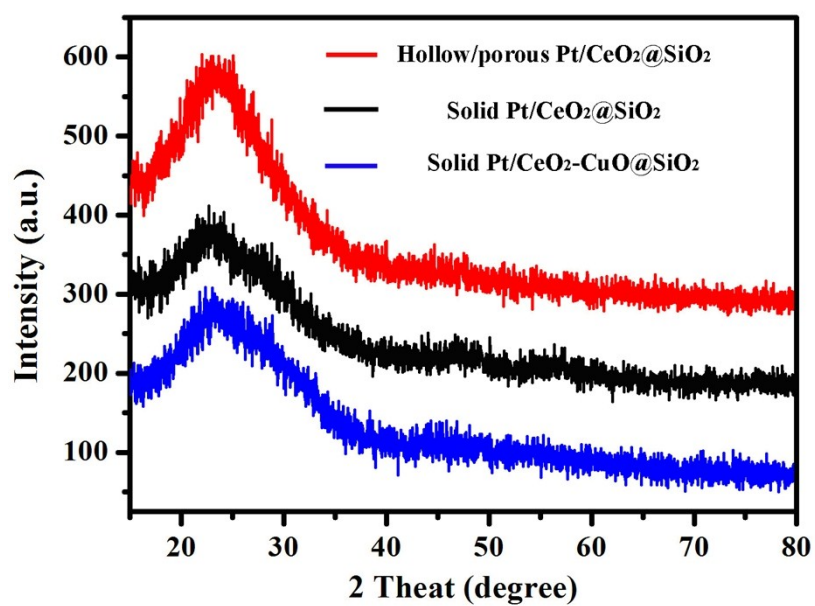

**Figure S4.** XRD patterns of the prepared porous/hollow structured Pt/CeO<sub>2</sub>@SiO<sub>2</sub>, solid Pt/CeO<sub>2</sub>@SiO<sub>2</sub> and Pt/CeO<sub>2</sub>-CuO@SiO<sub>2</sub> catalysts.

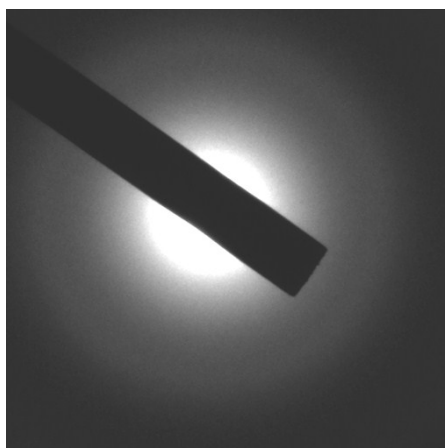

**Figure S5.** SAED pattern of the prepared porous/hollow structured Pt/CeO<sub>2</sub>@SiO<sub>2</sub> catalyst.

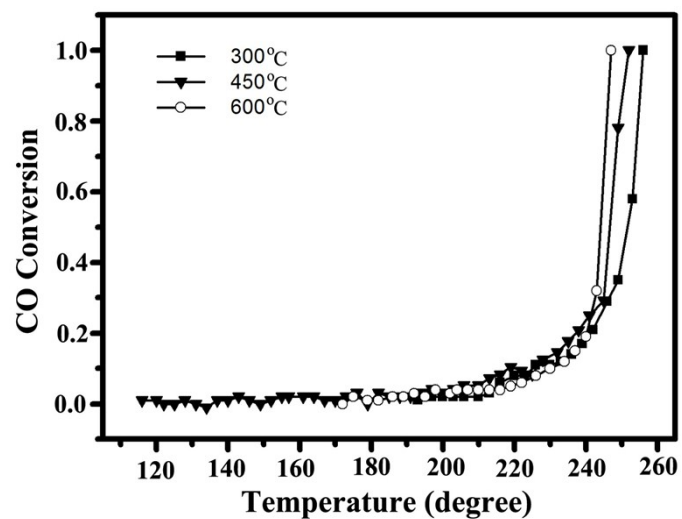

**Figure S6.** CO conversion as a function of temperature over the solid Pt/CeO<sub>2</sub>@SiO<sub>2</sub> catalysts treated at different temperatures.

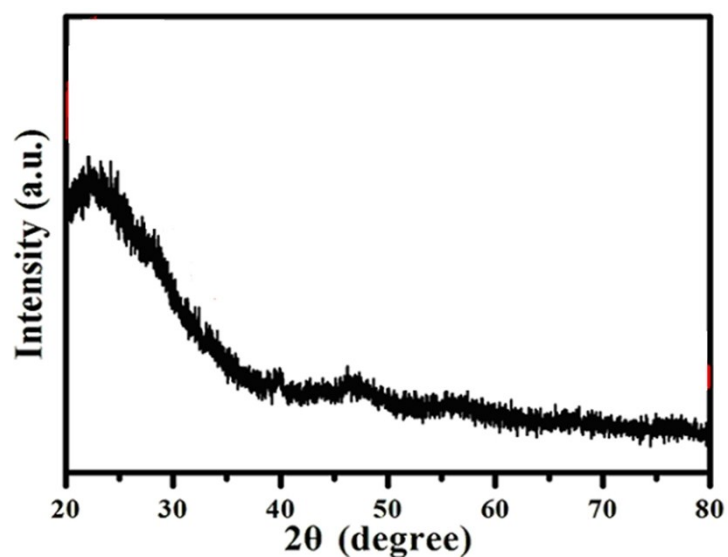

**Figure S7.** XRD pattern of the prepared hollow/porous structured Pt/CeO<sub>2</sub>@SiO<sub>2</sub> catalyst treated at 600 °C for 2h.
